# Supplementary material
Source: PubMed Central journal article supplement (PMC2613643)
Supplement: NIHMS69210-supplement-01.pdf [file NIHMS69210-supplement-01.pdf]

**Supplemental Data**  
**Cell Metabolism, *Volume 8***

**Activation of the PPAR/PGC-1 $\alpha$  Pathway Prevents a Bioenergetic Deficit and Effectively Improves a Mitochondrial Myopathy Phenotype**

Tina Wenz, Francisca Díaz, Bruce M. Spiegelman, and Carlos T. Moraes

## Supplemental data, figure S1

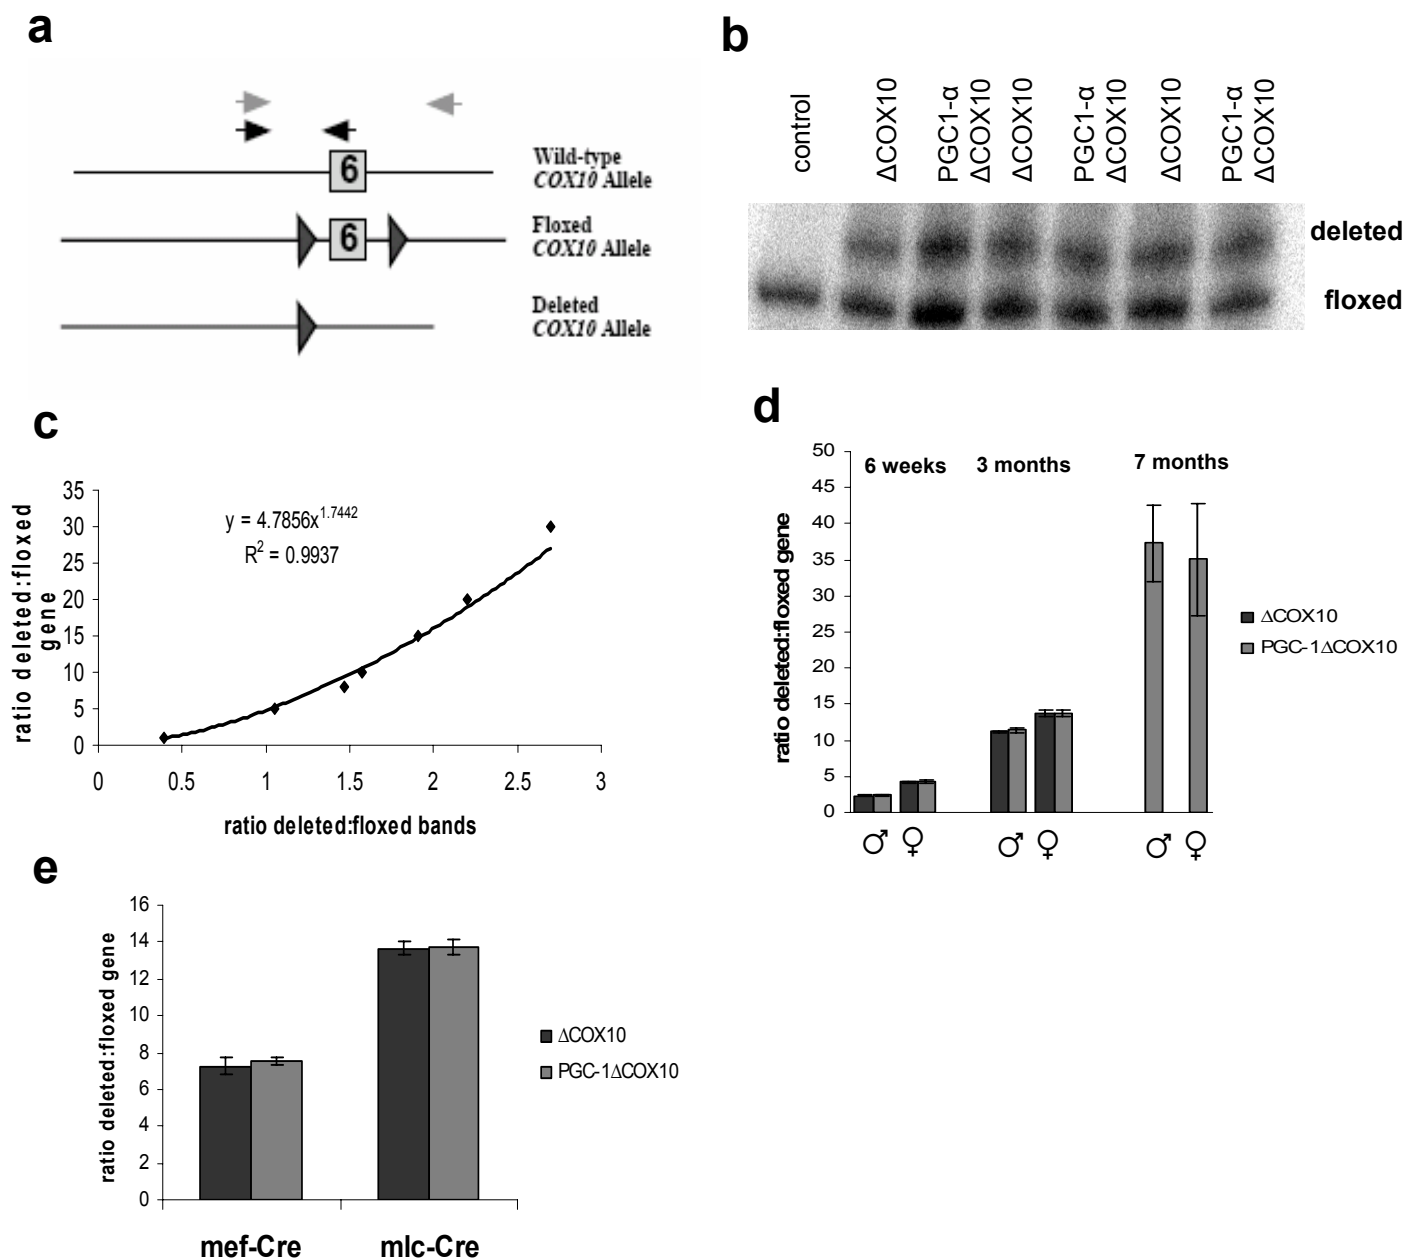

**Figure S1: Relative quantification of the deletion of the floxed *COX10* gene by the Cre transgene in PGC-1 $\alpha$  $\Delta$ COX10 and  $\Delta$ COX10 mice**

(a) Diagram of the *COX10* gene showing the exon 6 wild-type allele, the floxed *COX10* allele (triangles represent the loxP sites flanking the exon) and the deleted *COX10* allele resulting from Cre recombination. Arrows indicate the primer sets used to amplify the floxed (black arrows) and the deleted allele (grey arrows). (b) Last cycle hot multiplex PCR showing amplification of the deletion and floxed *COX10* alleles. (c) Calibration curve for PCR quantification of the deleted and the floxed *COX10* alleles. (d) Course of deletion of the floxed *COX10* allele in skeletal muscle comparing PGC-1 $\alpha$  $\Delta$ COX10 and  $\Delta$ COX10 mice. (e) Deletion of the floxed *COX10* allele in skeletal muscle of 3 months old PGC-1 $\alpha$  $\Delta$ COX10 and  $\Delta$ COX10 mice comparing the mlc- and mef-Cre recombinase transgene.

## Supplemental data, figure S2

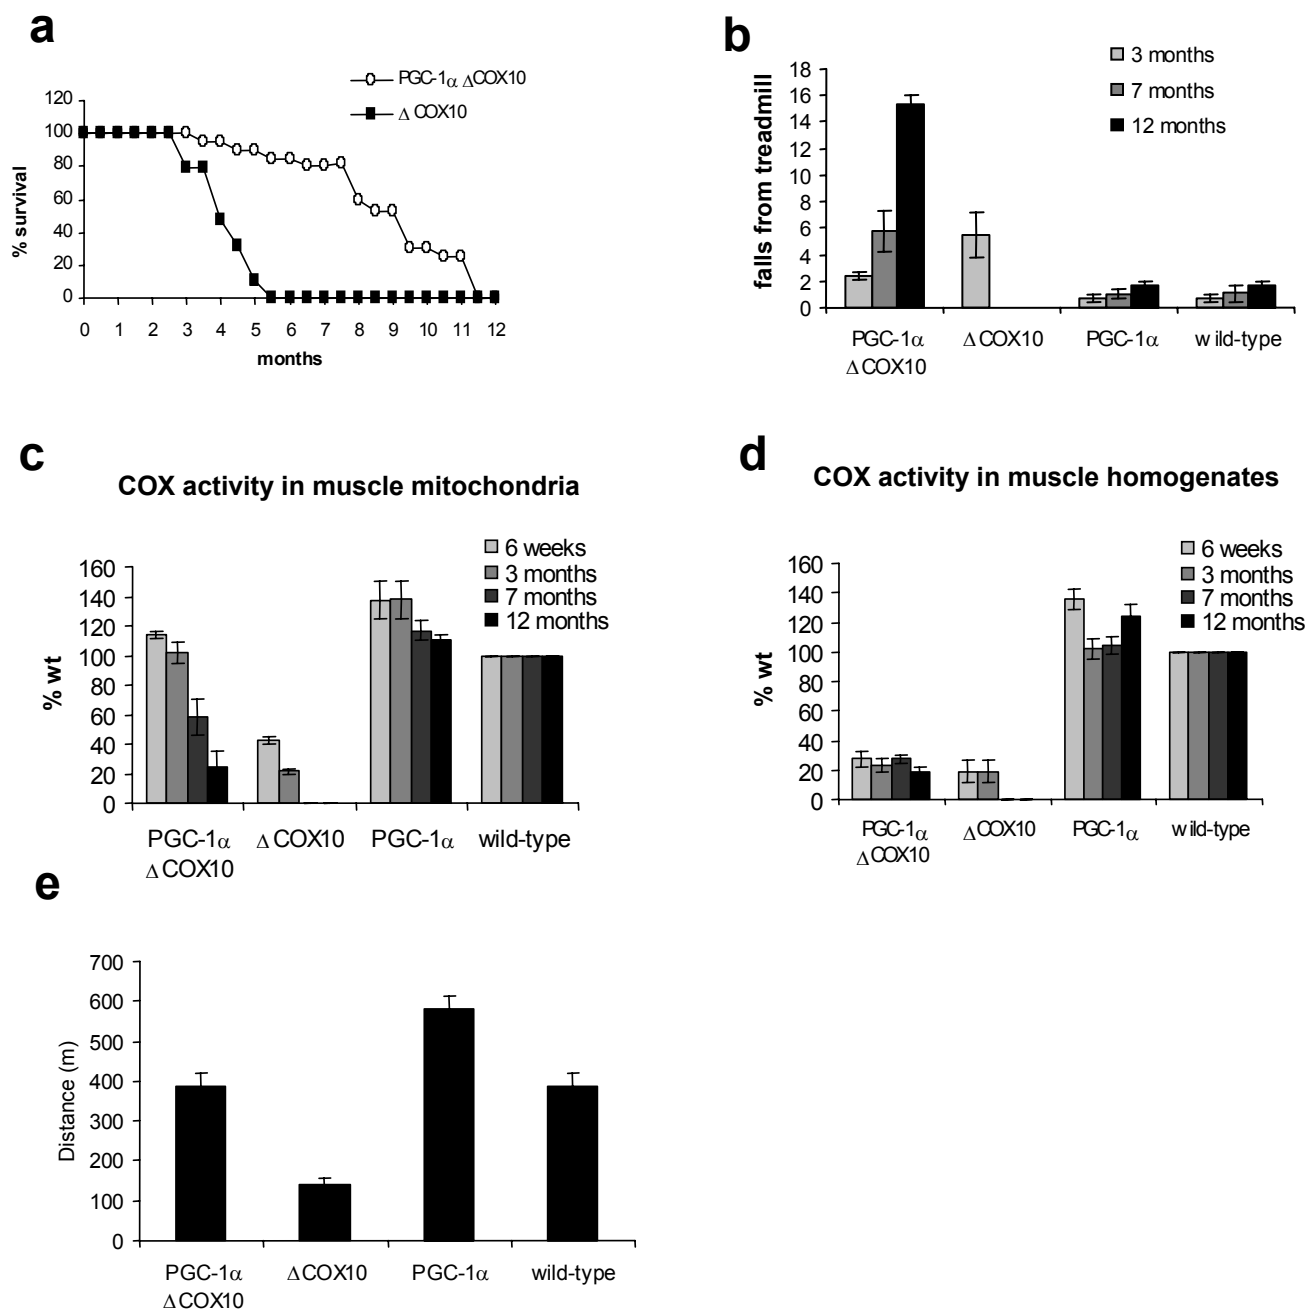

**Figure S2: Data for male PGC-1 $\alpha$  $\Delta$ COX10 mice, mlc-Cre recombinase transgene**

(a) Survival curve of male PGC-1 $\alpha$  $\Delta$ COX10 mice in comparison to  $\Delta$ COX10 mice (N=20 for each group). (b) Treadmill performance test at different ages for male PGC-1 $\alpha$  $\Delta$ COX10,  $\Delta$ COX10, PGC-1 $\alpha$  and wild-type mice (N= 6 for each group). Statistical significance was reached for the pairwise comparison between  $\Delta$ COX10 and each of the other groups. Comparison between other pairs did not reach statistical significance. (c) + (d) Cytochrome *c* oxidase (COX) activity of male PGC-1 $\alpha$  $\Delta$ COX10,  $\Delta$ COX10, PGC-1 $\alpha$  and wild-type mice at different ages comparing muscle homogenates and muscle mitochondria (N=3 for each group). (e) Average total distance traveled in an endurance test for 3 month old male PGC-1 $\alpha$  $\Delta$ COX10,  $\Delta$ COX10, PGC-1 $\alpha$  and wild-type mice is shown (N=6 for each group).

# Supplemental data, figure S3 (mef-Cre)

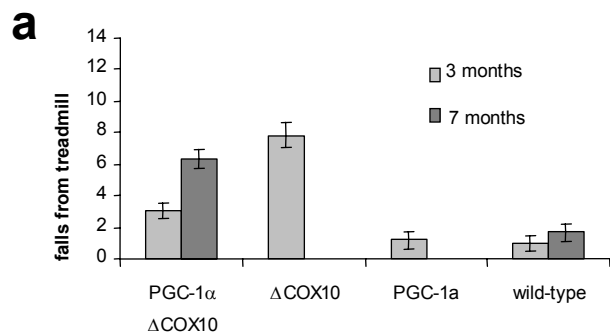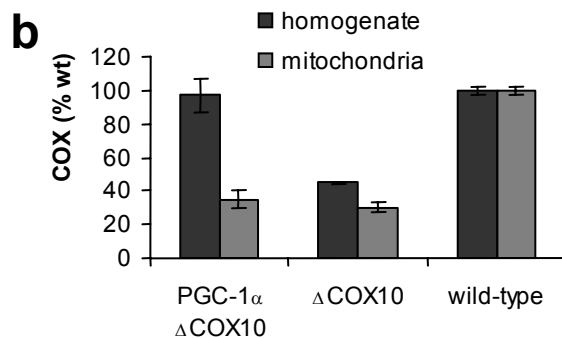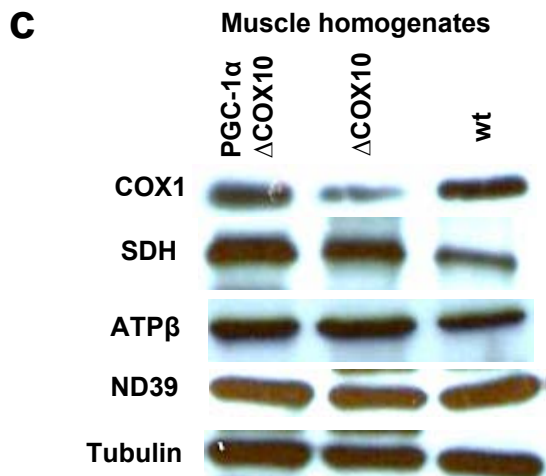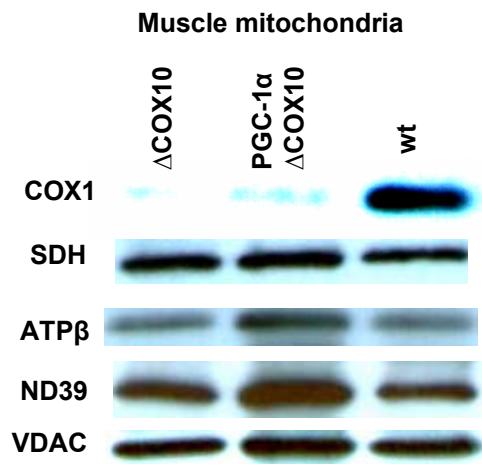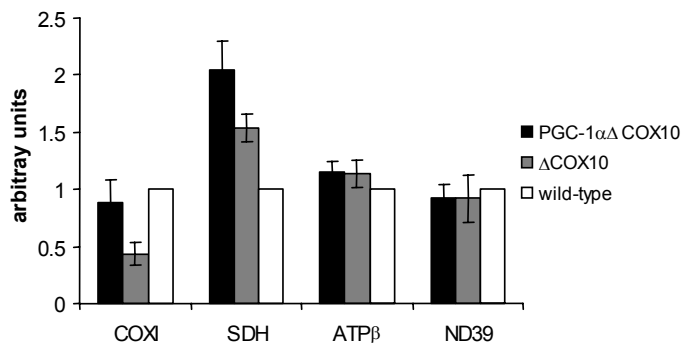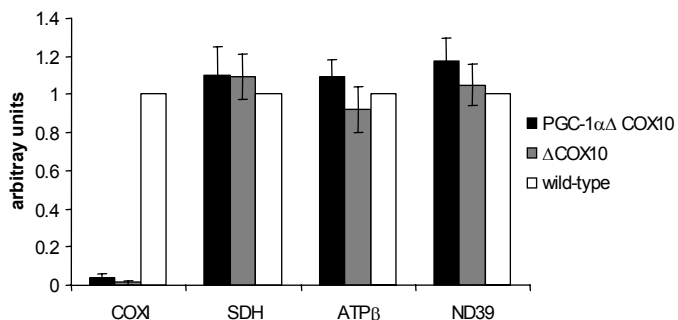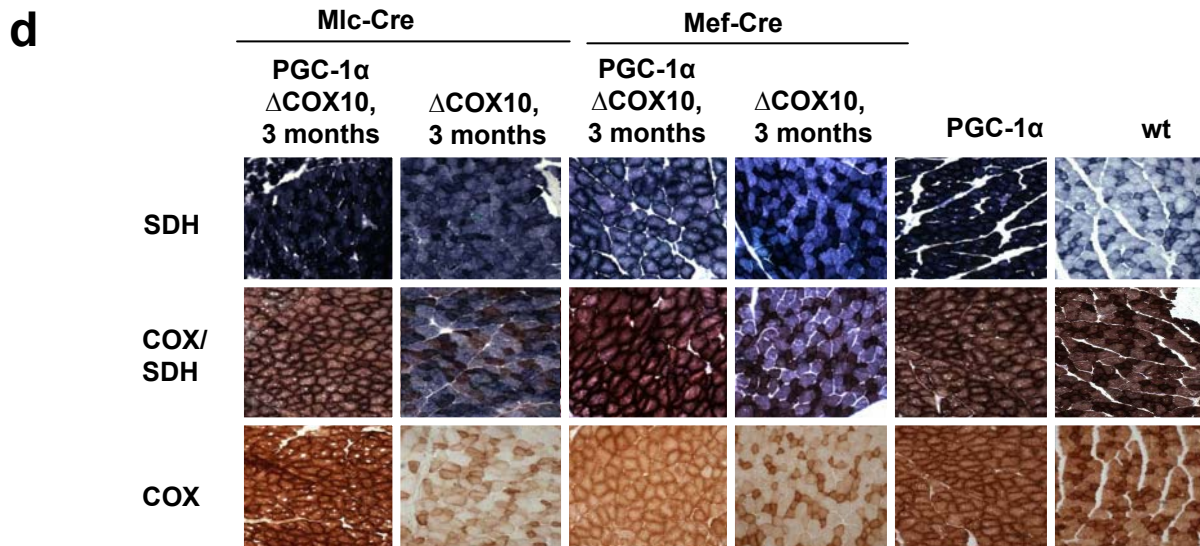

## Supplemental data, figure 3 (mef-Cre)

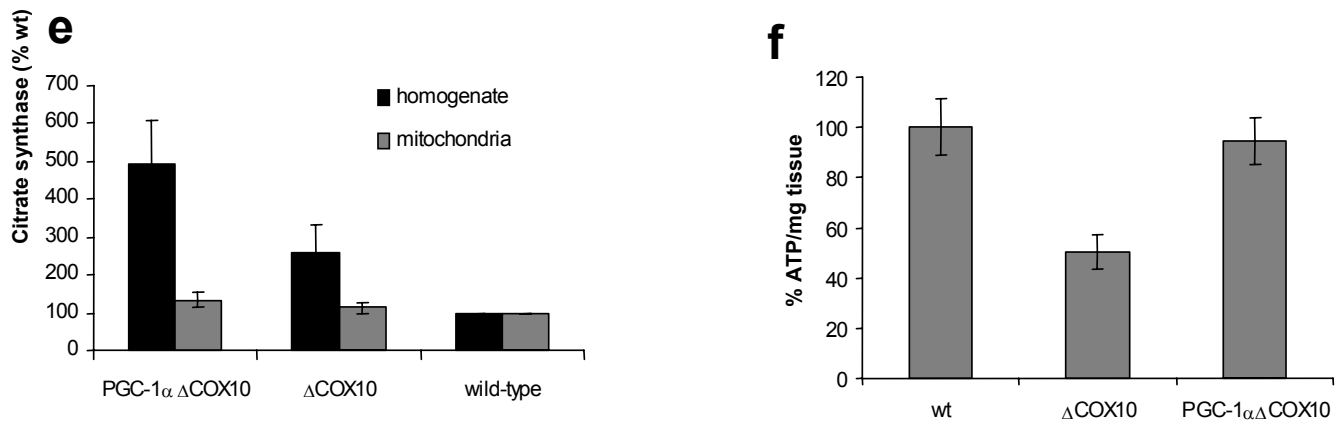

### Figure S3: Data for female PGC-1 $\alpha$ $\Delta$ COX10 mice, mef-Cre recombinase transgene

(a) Treadmill performance test at different ages for female PGC-1 $\alpha$  $\Delta$ COX10,  $\Delta$ COX10, PGC-1 $\alpha$  and wild-type mice (N= 6 for each group) (b) Cytochrome *c* oxidase (COX) activity of 3 months old female PGC-1 $\alpha$  $\Delta$ COX10,  $\Delta$ COX10, PGC-1 $\alpha$  and wild-type mice at different ages comparing muscle homogenates and muscle mitochondria (N=3 for each group). (c) Quantification of mitochondrial proteins and loading control in muscle homogenates and muscle mitochondria of 3 months old female PGC-1 $\alpha$  $\Delta$ COX10,  $\Delta$ COX10, PGC-1 $\alpha$  and wild-type mice by western blot and densitometry (N=3 for each group). (d) Histology of the biceps femoris muscle from 3 months old female PGC-1 $\alpha$  $\Delta$ COX10 and  $\Delta$ COX10 comparing the effect of the different Cre-transgene. (e) Citrate synthase activity of 3 months old female PGC-1 $\alpha$  $\Delta$ COX10,  $\Delta$ COX10, PGC-1 $\alpha$  and wild-type mice at different ages comparing muscle homogenates and muscle mitochondria (N=3 for each group). (f) Quantification of ATP in the biceps femoris muscle from 3 months old female PGC-1 $\alpha$  $\Delta$ COX10,  $\Delta$ COX10, PGC-1 $\alpha$  and wild-type mice (N=4 for each group).

## Supplemental data, figure S4

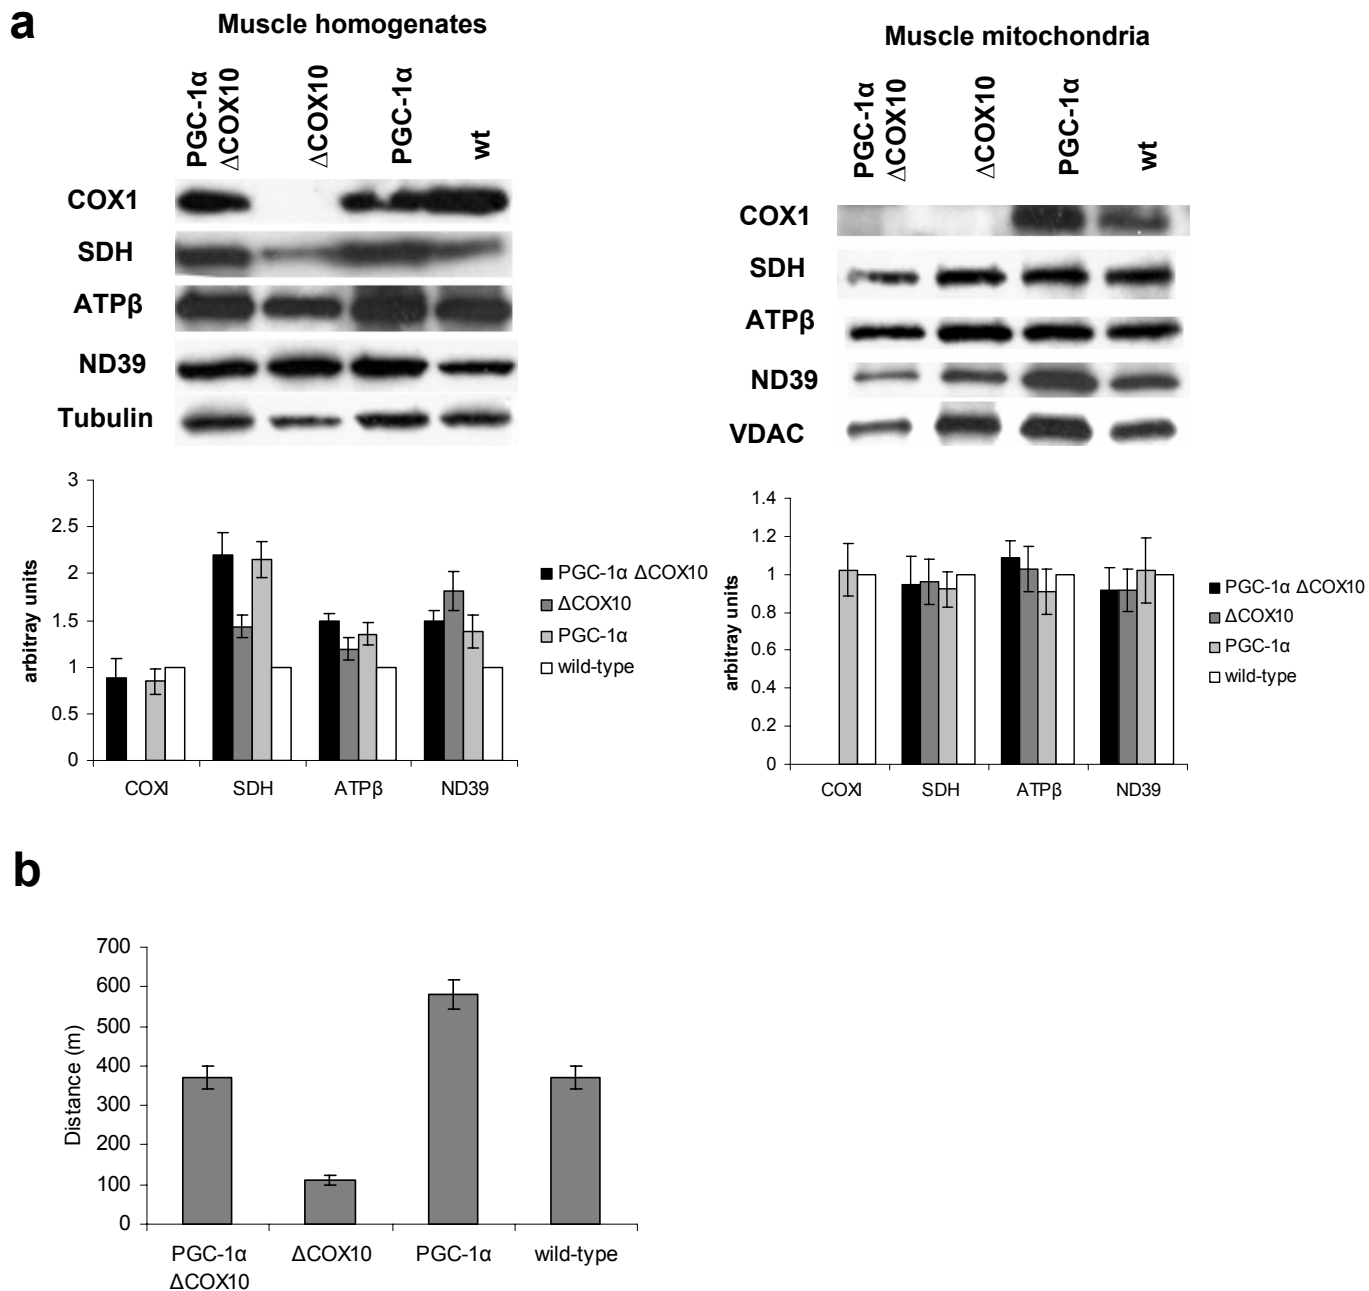

**Figure S4: Data for female PGC-1 $\alpha$  $\Delta$ COX10 mice, *mlc*-Cre recombinase transgene**

(a) Quantification of mitochondrial proteins and loading control in muscle homogenates and muscle mitochondria of 3 months old female PGC-1 $\alpha$  $\Delta$ COX10,  $\Delta$ COX10, PGC-1 $\alpha$  and wild-type mice by western blot and densitometry (n=3 for each group). (b) Schematic representation of the treadmill protocol used to determine the ability to perform endurance exercise. The average total distance traveled for 3 month old female PGC-1 $\alpha$  $\Delta$ COX10,  $\Delta$ COX10, PGC-1 $\alpha$  and wild-type mice is shown (n=6 for each group). The average weight is shown for better clarity. The range was between 4-6 g.

# Supplemental data, figure S5 (bezafibrate)

**a**

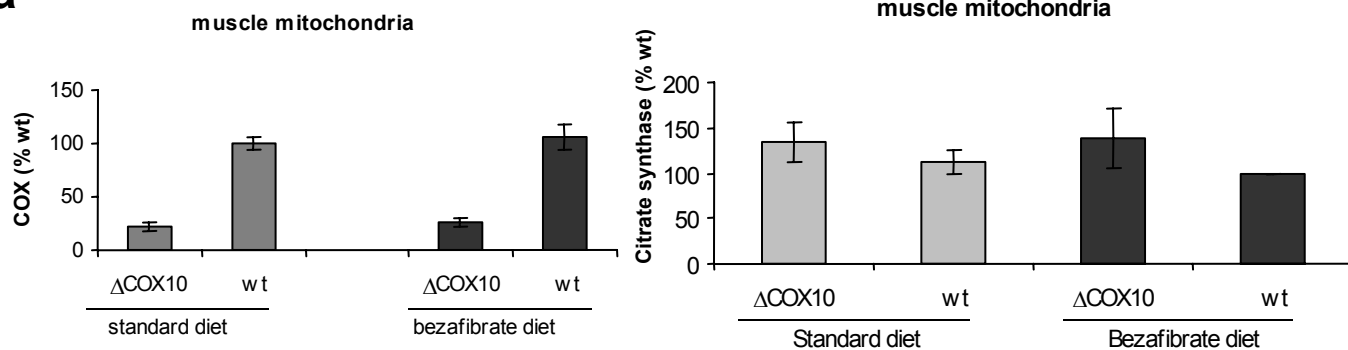

**b**

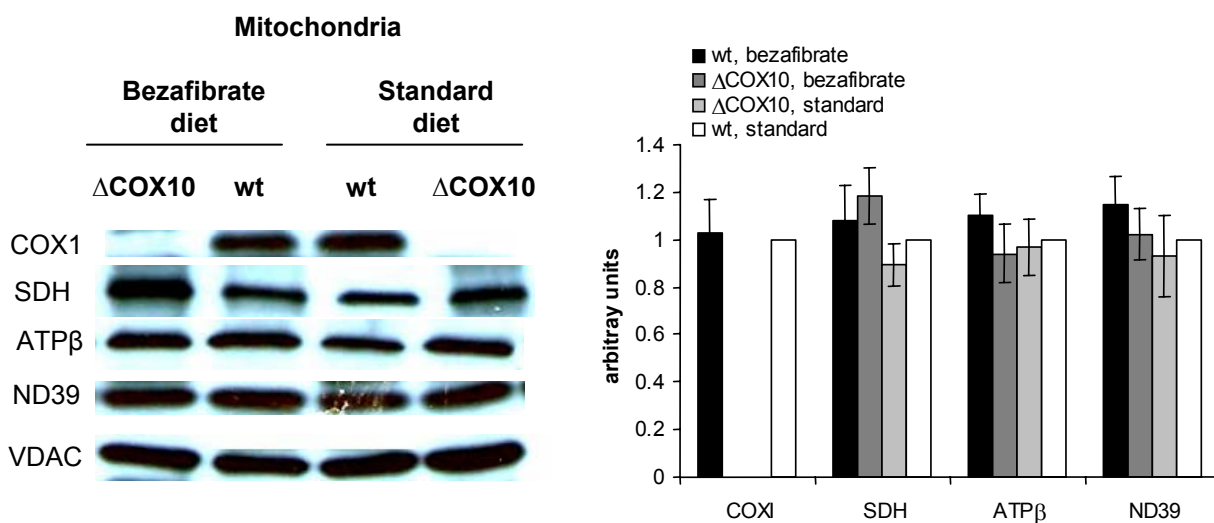

**c**

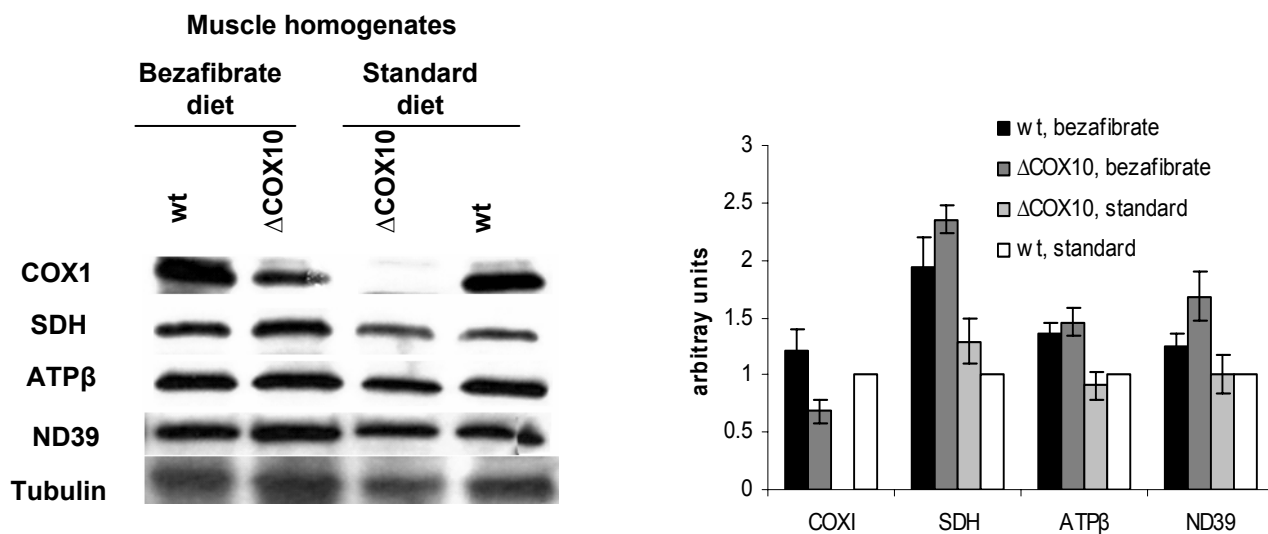

**d**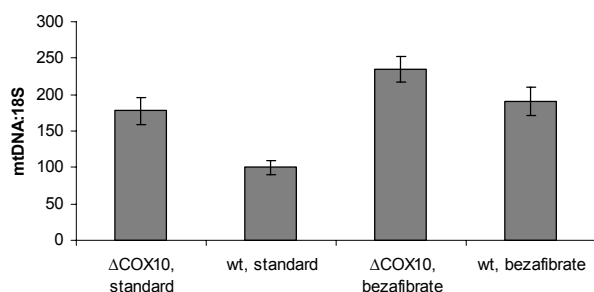**e**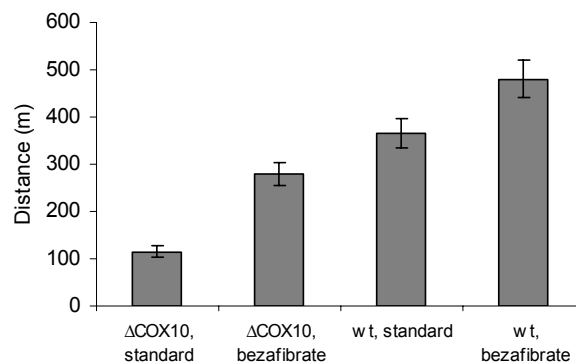**Figure S5: Data of mitochondrial fractions from bezafibrate mice**

(a) Cytochrome *c* oxidase (COX) and citrate synthase in muscle mitochondria of 3 months old female  $\Delta$ COX10 and wildtype mice on a bezafibrate and regular diet (N=3 for each group). (b+c) Quantification of mitochondrial proteins and loading control in muscle homogenates (d) Relative quantification of mitochondrial DNA versus nuclear DNA by signal intensity of mtDNA and 18S bands in a southern blot of DNA isolated from skeletal muscle from 3 months old female  $\Delta$ COX10 and wild-type mice on a standard diet or on the bezafibrate diet (n=3 for each group). (e) Average total distance traveled in an endurance test for 3 month old female  $\Delta$ COX10 and wild-type mice on the bezafibrate diet comparison to animals on a regular diet (n=3 for each group).
